# Supplementary material
Source: publisher figshare collection journal article supplement (https://frontiersin.figshare.com/ndownloader/files/22538363)

## Supplementary Material

### 1 Supplementary Figures

#### Supplementary Figure 1. Flow cytometry gating strategy

Purified pDCs and  $\gamma\delta$  T cells from healthy donors' blood were cocultured in absence or presence of TLR7L (CL097), TLR9L (CpG<sub>A</sub>), phosphoantigens IPP or HMBPP together with zoledronate (Zol) or not. The phenotypic features of pDCs or  $\gamma\delta$  T cells were depicted by flow cytometry. (A-C) Upon pDC stimulation,  $\gamma\delta$  T cell features were defined:  $\gamma\delta$  T cells were defined using CD45, CD3, pan  $\gamma\delta$  TCR and  $\delta 2$  markers (A), and CD69, CD25 and CD107 expression were further analyzed (B) together with immune checkpoints (LAG3 is shown) (C). (D-F) Upon  $\gamma\delta$  T cell activation, pDC features were depicted: pDCs were determined using CD45, HLA-DR and BDCA4 markers (D), and expression of CD40, CD86 and TRAIL was analyzed (E) together with immune checkpoints (PDL1 is shown) (F).

#### Supplementary Figure 2. pDCs trigger phenotypic modulation of $\gamma\delta$ T-cell subsets

Purified pDCs and  $\gamma\delta$  T cells from healthy donors' blood were cocultured in absence (white dots) or presence of TLR7L (CL097) (light gray symbols), TLR9L (CpG<sub>A</sub>) (dark gray symbols) together with zoledronate (Zol) (square symbols) or not (round symbols). The phenotypic features of  $\gamma\delta$  T cells including  $\delta 2^+$  and  $\delta 2^-$  subsets were depicted by flow cytometry. (A) Expression of selected immune checkpoints and NKR by  $\gamma\delta$  T cells: GITR, OX40, NKp30, NKp44 and ICOS (n= 7 to 11). (B-C) Activation status of  $\delta 2^+$  and  $\delta 2^-$  T-cell subsets evaluated by assessing CD69 (B) and CD25 (C) expression (n=13 to 26). (D) Expression of selected immune checkpoints and NKR by  $\delta 2^+$  and  $\delta 2^-$  T-cell subsets: TIM3, LAG3, PD-1, 41BB, and NKG2D (n=7 to 11). (E) The cytotoxic activity of  $\delta 2^+$  and  $\delta 2^-$  T-cell subsets was evaluated through CD107 surface expression upon subsequent coculture with melanoma tumor cells (n=7 to 21). P-values were calculated using the Wilcoxon matched pairs test with Bonferroni correction.

#### Supplementary Figure 3. TLR7/9L stimulation triggers pDC activation while Zol and HMB-PP have no direct impact on pDC' features

Purified pDCs from healthy donors' blood were cultured with or without (A) TLR7L (CL097), TLR9L (CpG<sub>A</sub>) or zoledronate (Zol) (n=9 to 11) or (B) HMB-PP alone or combined with Zol (n=4). The phenotypic and functional features of pDCs were then assessed through CD40, CD80 and CD86 expression, TRAIL exposure and IFN $\alpha$  secretion. Bars represents mean $\pm$ SEM. P-values were calculated using the Wilcoxon matched pairs test with Bonferroni correction.

#### Supplementary Figure 4. HMB-PP elicits activation and functionality of $\gamma\delta$ T cells while TLR7/9L and Zol have no direct impact on $\gamma\delta$ T cells' features

Purified  $\gamma\delta$  T cells from healthy donor' blood were cultured with or without (A) HMB-PP (n=13 to 25) or (B,C) TLR7L (CL097), TLR9L (CpG<sub>A</sub>), zoledronate (Zol) alone or in combination (n=4). The phenotypic and functional features of  $\gamma\delta$  T cells,  $\delta 2^+$  and  $\delta 2^-$  T-cell subsets were assessed through CD69, CD25 expression, IFN $\gamma$  secretion and CD107 exposure upon further coculture with tumor cells. Bars represents mean $\pm$ SEM. P-values calculated using the Wilcoxon matched pairs test with Bonferroni correction.

**Supplementary Figure 5. The interplay between pDCs and  $\gamma\delta$  T cells require the activation of one partner**

(A-B) Purified pDCs or  $\gamma\delta$  T cells from healthy donors' blood were cultured alone (white symbols) or in presence of the cross-talk partner (dark symbols) in absence of any stimulation. (A) The phenotypic and functional features of  $\gamma\delta$  T cells were assessed through CD69 and CD25 expression, IFN $\gamma$  secretion and CD107 exposure upon further coculture with tumor cells (n=18 to 26). Bars represents mean $\pm$ SEM. (B) The phenotypic and functional features of pDCs were assessed through CD40, CD80 and CD86 expression, TRAIL exposure and IFN $\alpha$  secretion (n=9 to 12). (C) IFN $\gamma$  secretion during  $\gamma\delta$  T cell/pDC co-culture in absence of stimulation (-) or in presence of HMB-PP or Zol. Bars represents mean $\pm$ SEM. P-values were calculated using the Wilcoxon matched pairs test.

**Supplementary Figure 6. Membrane contacts and soluble factors are required for effective cross-talk between pDCs and  $\delta 2^+$  /  $\delta 2^-$  T-cell subsets**

Purified pDCs and  $\gamma\delta$  T cells from healthy donor' blood were cocultured together in the same well (white bars) or physically separated by a 0.4 $\mu$ m membrane (transwell, gray bars) in absence or presence of TLR7L (CL097), TLR9L (CpG<sub>A</sub>) or zoledronate (Zol) as indicated. The phenotypic features (CD69 and CD25 expression) and cytotoxic properties (CD107 exposure upon coculture with tumor cells) of  $\delta 2^+$  and  $\delta 2^-$  T-cell subsets were assessed to identify the requirement for membrane contacts and/or soluble factors for their cross-talk with pDCs (n=8). Bars represents mean $\pm$ SEM. P-values were calculated using the Wilcoxon matched pairs test.

**Supplementary Figure 7. Experimental schemes for blocking experiments**

(A) Strategy for blocking single molecules, BTN3A or mixtures to determine the mechanism of the pDC-  $\gamma\delta$  T cells cross-talk. (B) Strategy for blocking single molecules, BTN3A or mixtures to determine the mechanism of the  $\gamma\delta$  T cell-pDC cross-talk.

**Supplementary Figure 8. pDCs and  $\gamma\delta$  T cells differentially expressed TNF $\alpha$ RI, TNF $\alpha$ RII and IFN $\alpha$ RI/RII**

(A) Basal expression of TNF $\alpha$ RI, TNF $\alpha$ RII, IFN $\alpha$ RI and IFN $\alpha$ RII by  $\gamma\delta$  T cells and pDCs determined within PBMC (n=4). (B) The expression of TNF $\alpha$ RI, TNF $\alpha$ RII, IFN $\alpha$ RI and IFN $\alpha$ RII by  $\gamma\delta$  T cells and pDCs was evaluated during the coculture of purified pDCs and  $\gamma\delta$  T cells in presence or not of HMB-PP, CL097, CpGA or Zol (n=2).

**Supplementary Figure 9. The blocking of BTN3A or the use of the Supermix doesn't prevent pDC response to TLR7/9L stimulation**

Purified pDCs from healthy donor' blood were cultured with or without TLR7L (CL097), TLR9L (CpG<sub>A</sub>) or zoledronate (Zol) in presence or not of blocking antibodies. The ability of pDCs to upregulate activation molecules (CD40, CD80, CD86), express TRAIL and secrete IFN $\alpha$  was then evaluated. (A) Cultures performed in presence or not of anti-BTN3A blocking antibody (n=6). (B) Cultures performed in presence or not of the Supermix composed of anti-IFNAR, -TNFR1, -TNFR2 and -OX40 blocking antibodies together with anti-BTN3A1 blocking antibodies (n=6). Bars represents mean $\pm$ SEM. P-values were calculated using the Wilcoxon matched pairs test.

**Supplementary Figure 10. Relative impact of BTN3A compared to the other molecules targeted by the Supermix on the pDCs- $\gamma\delta$  T cells cross talk**

Purified pDCs from healthy donors' blood were pre-incubated either with single anti-BTN3A antibodies (n=12) or a Supermix composed of anti-IFNAR2, -TNFR1/TNFR2 and -OX40 antibodies together with anti-BTN3A blocking antibody (n=12), and cocultured with purified  $\gamma\delta$ T cells in the presence or not of TLR7-L (CL097) (light gray bars), TLR9-L (CpG<sub>A</sub>) (dark gray bars) or zoledronate (Zol) (black bars). The features of  $\gamma\delta$ T cells were then depicted: the activation status (CD25 and CD69 expression) and the cytotoxic activity (CD107 surface exposure) were analyzed by flow cytometry; IFN $\gamma$  secretion was measured by CBA in the supernatants. Bars represents mean $\pm$ SEM. P-values were calculated using the Wilcoxon-matched pairs test (full lines) or Mann-Whitney test (dotted lines) (\*p<0.05, \*\*p<0.01, \*\*\*p<0.001).

**Supplementary Figure 11.  $\gamma\delta$  T cells keep their ability to respond to HMB-PP stimulation in presence of blocking antibodies composing the “mix -“ or blocking of BTN3A**

(A) Purified  $\gamma\delta$  T cells from healthy donor' blood were cultured with or without HMB-PP or zoledronate (Zol) in presence or not of the “mix -“ composed of anti-IFN $\gamma$ R, -NKP30 and -GITR blocking antibodies (n=4-10). The ability to upregulate activation molecules (CD69, CD25) and secrete IFN $\gamma$  was then evaluated on  $\gamma\delta$  T cells. (B) Purified  $\gamma\delta$  T cells from healthy donor' blood were pre-activated for 4 hours with or without HMB-PP or zoledronate (Zol) and mixed with purified pDCs pre-cultured for 2 hours in presence or not of anti-BTN3A blocking antibodies (n=8). The ability to upregulate activation molecules (CD69, CD25) and secrete IFN $\gamma$  was then evaluated on  $\gamma\delta$  T cells. P-values were calculated using the Wilcoxon matched pairs test.

**Supplementary Figure 12. Relative impact of BTN3A compared to the other molecules targeted by the Supermix on the  $\gamma\delta$  T cells-pDCs cross talk**

Purified  $\gamma\delta$ T cells from healthy donor' blood were pre-activated with HMB-PP (light gray symbols) or Zol (dark gray symbols) during 4hours in absence (condition “BTN3A”, n=8) or presence of a mixture of blocking antibodies composed of anti-IFN $\gamma$ R, -NKP30, and -GITR antibodies (condition “Supermix”, n=9-10), and mixed with pDCs pre-blocked with single anti-BTN3A for 2hours. The features of pDCs were then depicted: the activation status (MFI CD40 on CD40-positive cells) and cytotoxic properties (TRAIL) were analyzed by flow cytometry, whereas the cytokine secretion (IFN $\alpha$  and IP10) was assessed by CBA in the supernatants. P-values were calculated using the Wilcoxon-matched pairs test (full lines) or Mann-Whitney test (dotted lines) (\*p<0.05, \*\*p<0.01, \*\*\*p<0.001).

Supplementary Figure 1

A

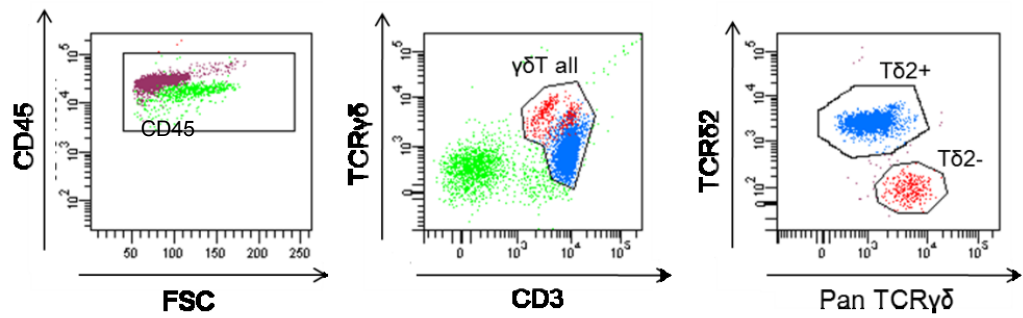

B

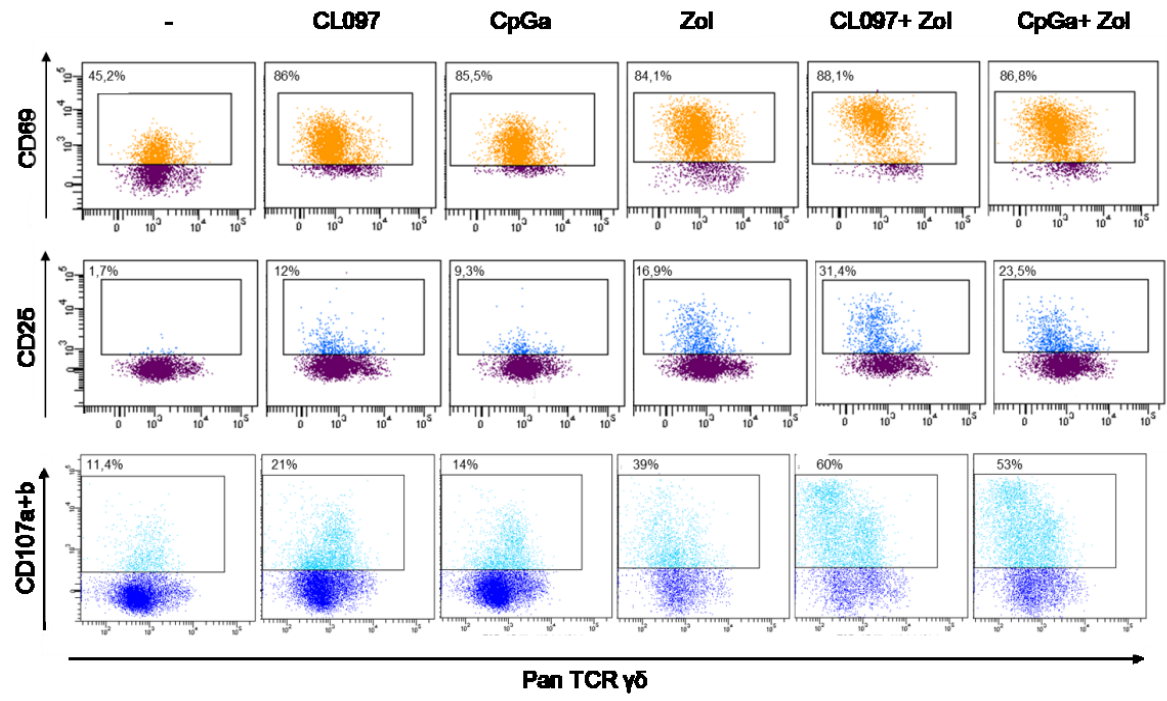

C

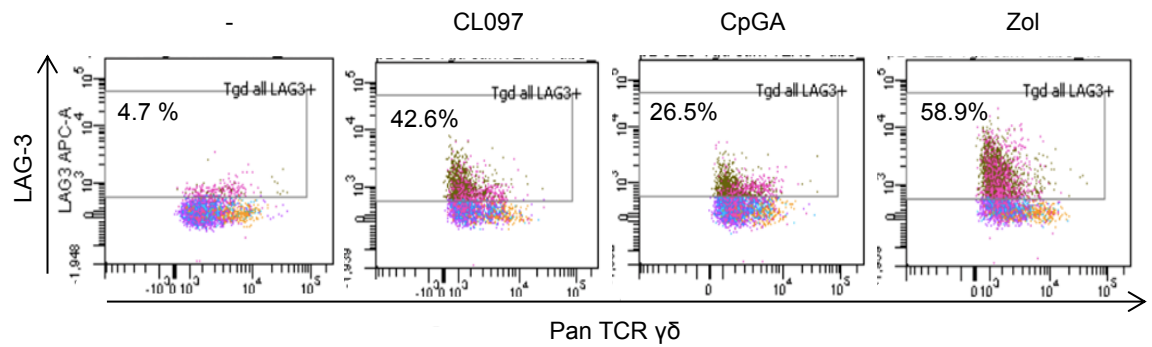

Supplementary Figure 1 follow

D

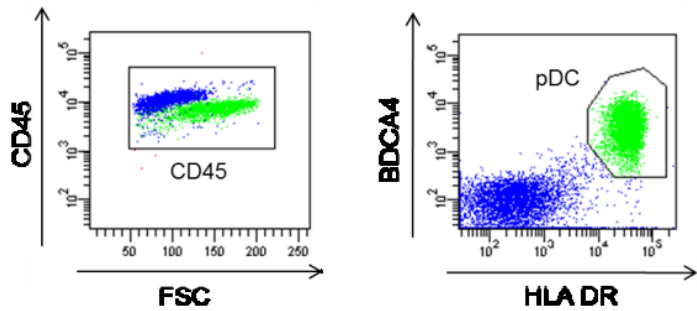

E

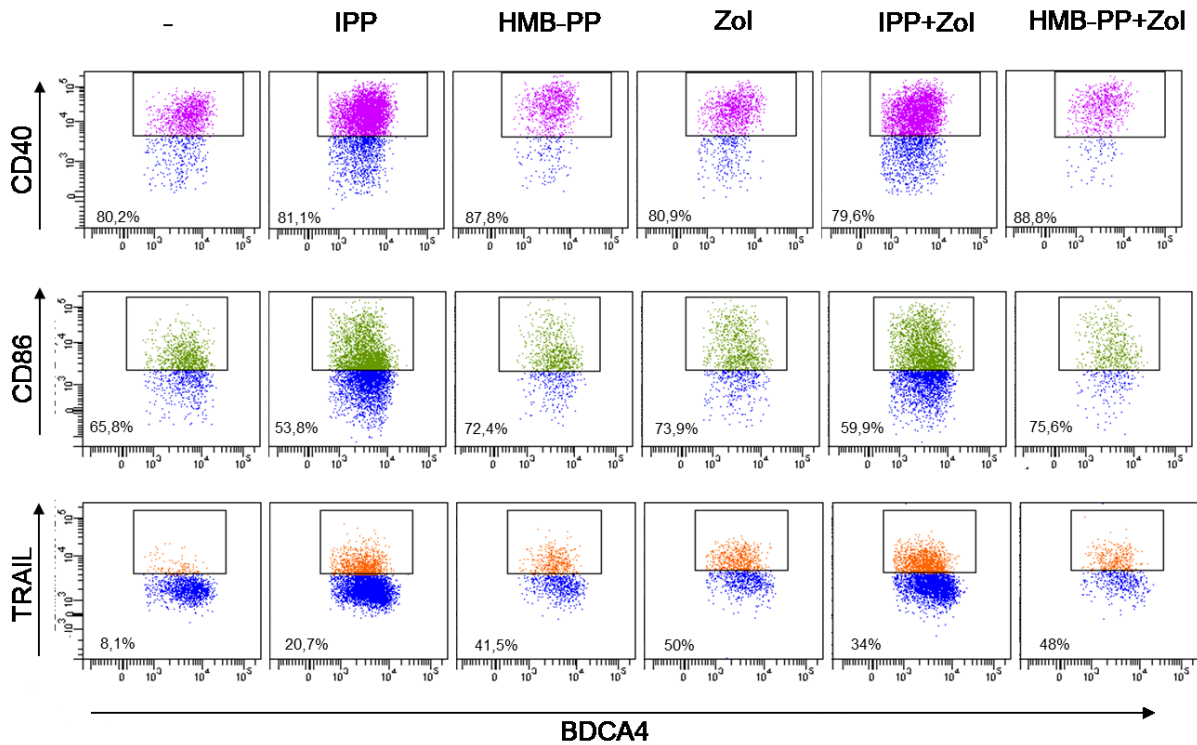

F

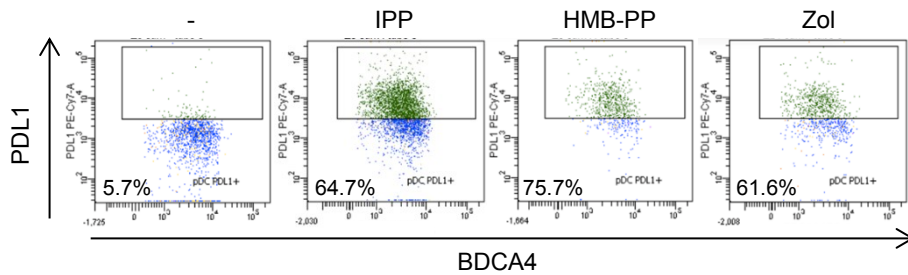

# Supplementary Figure 2

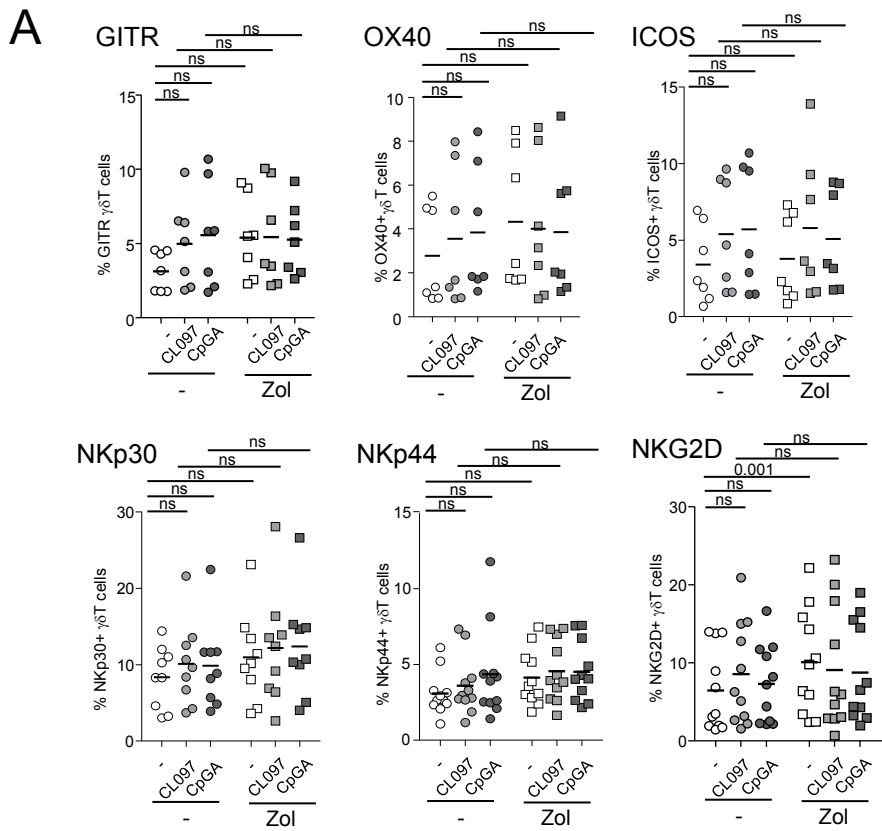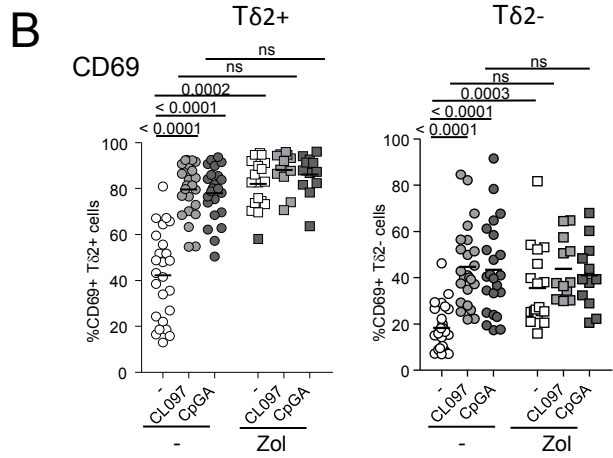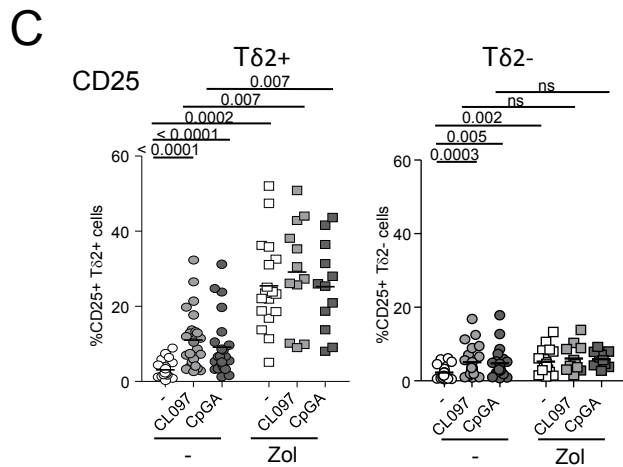

Supplementary Figure 2 follow

D

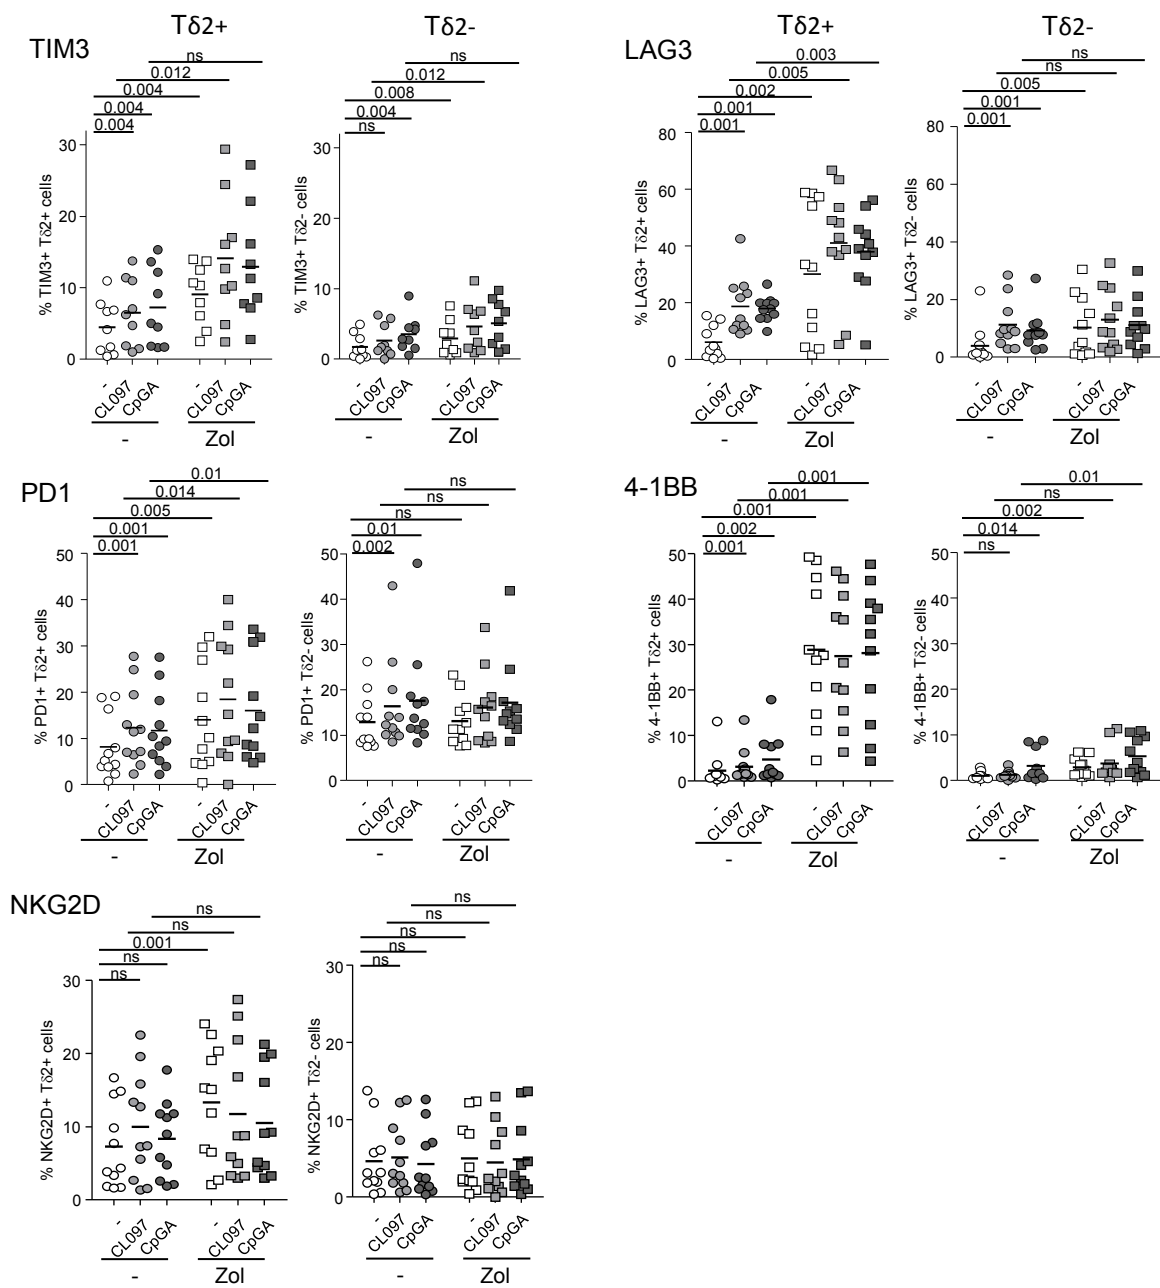

E

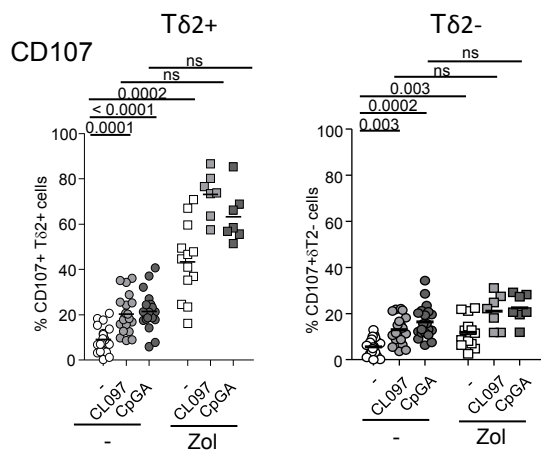

# Supplementary Figure 3

A

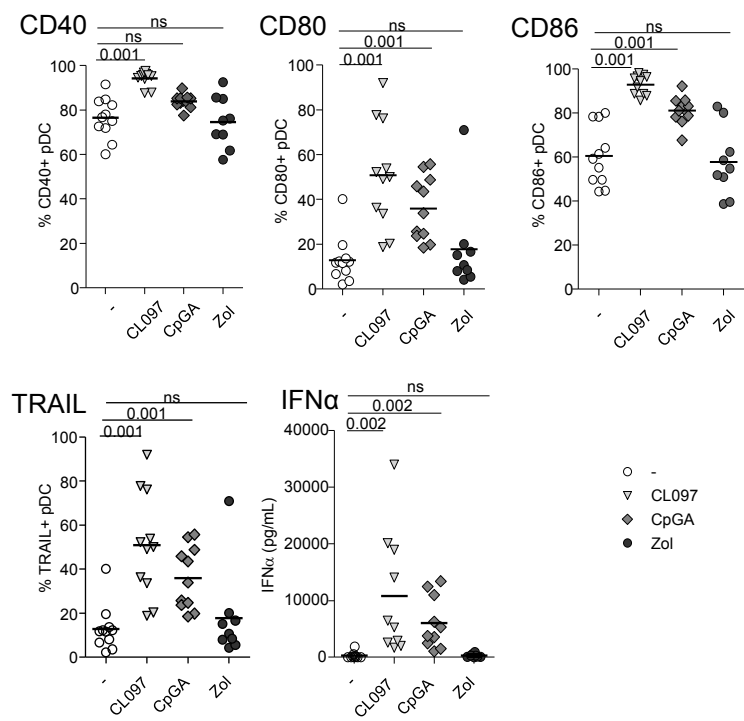

B

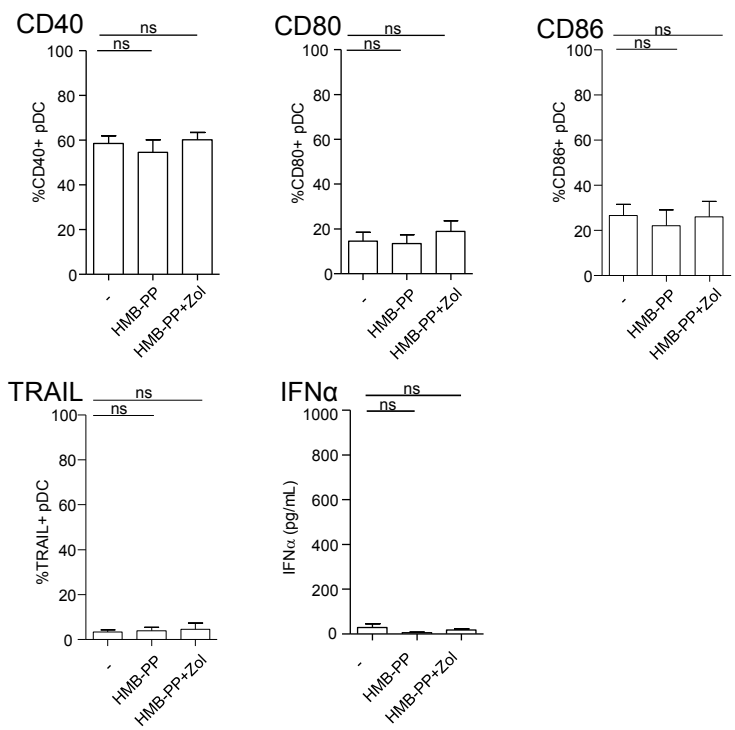



# Supplementary Figure 4

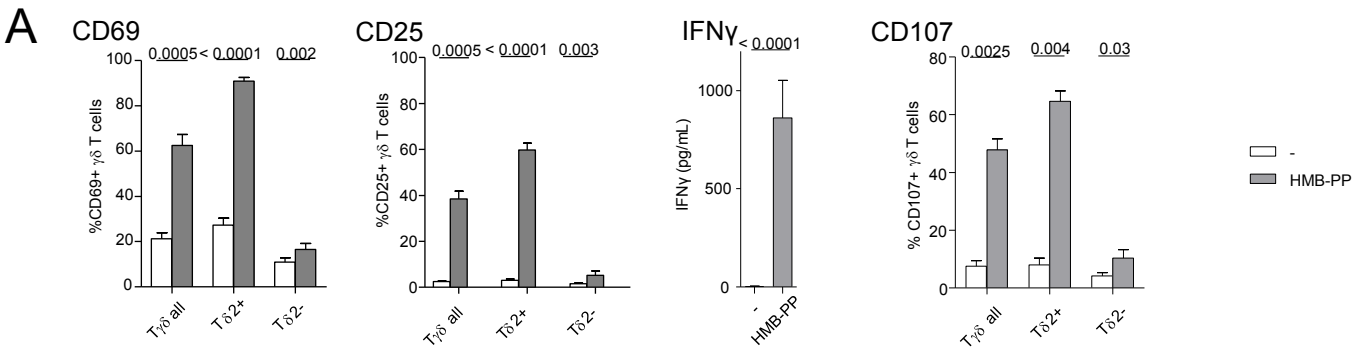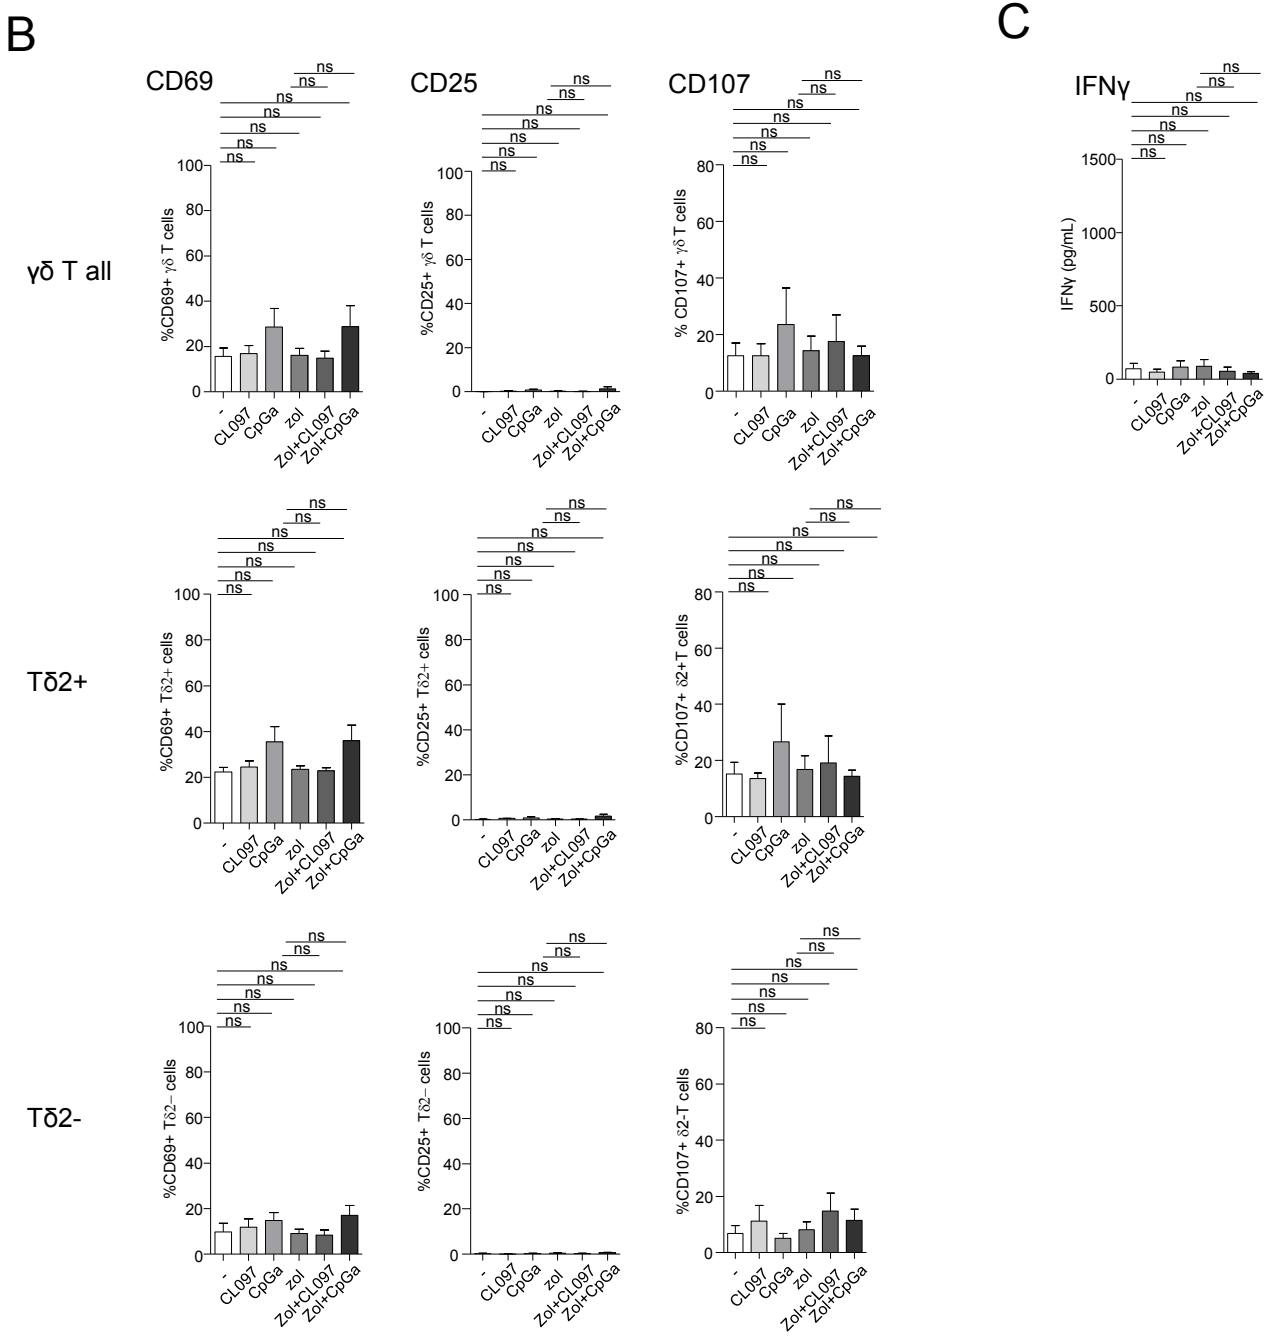

# Supplementary Figure 5

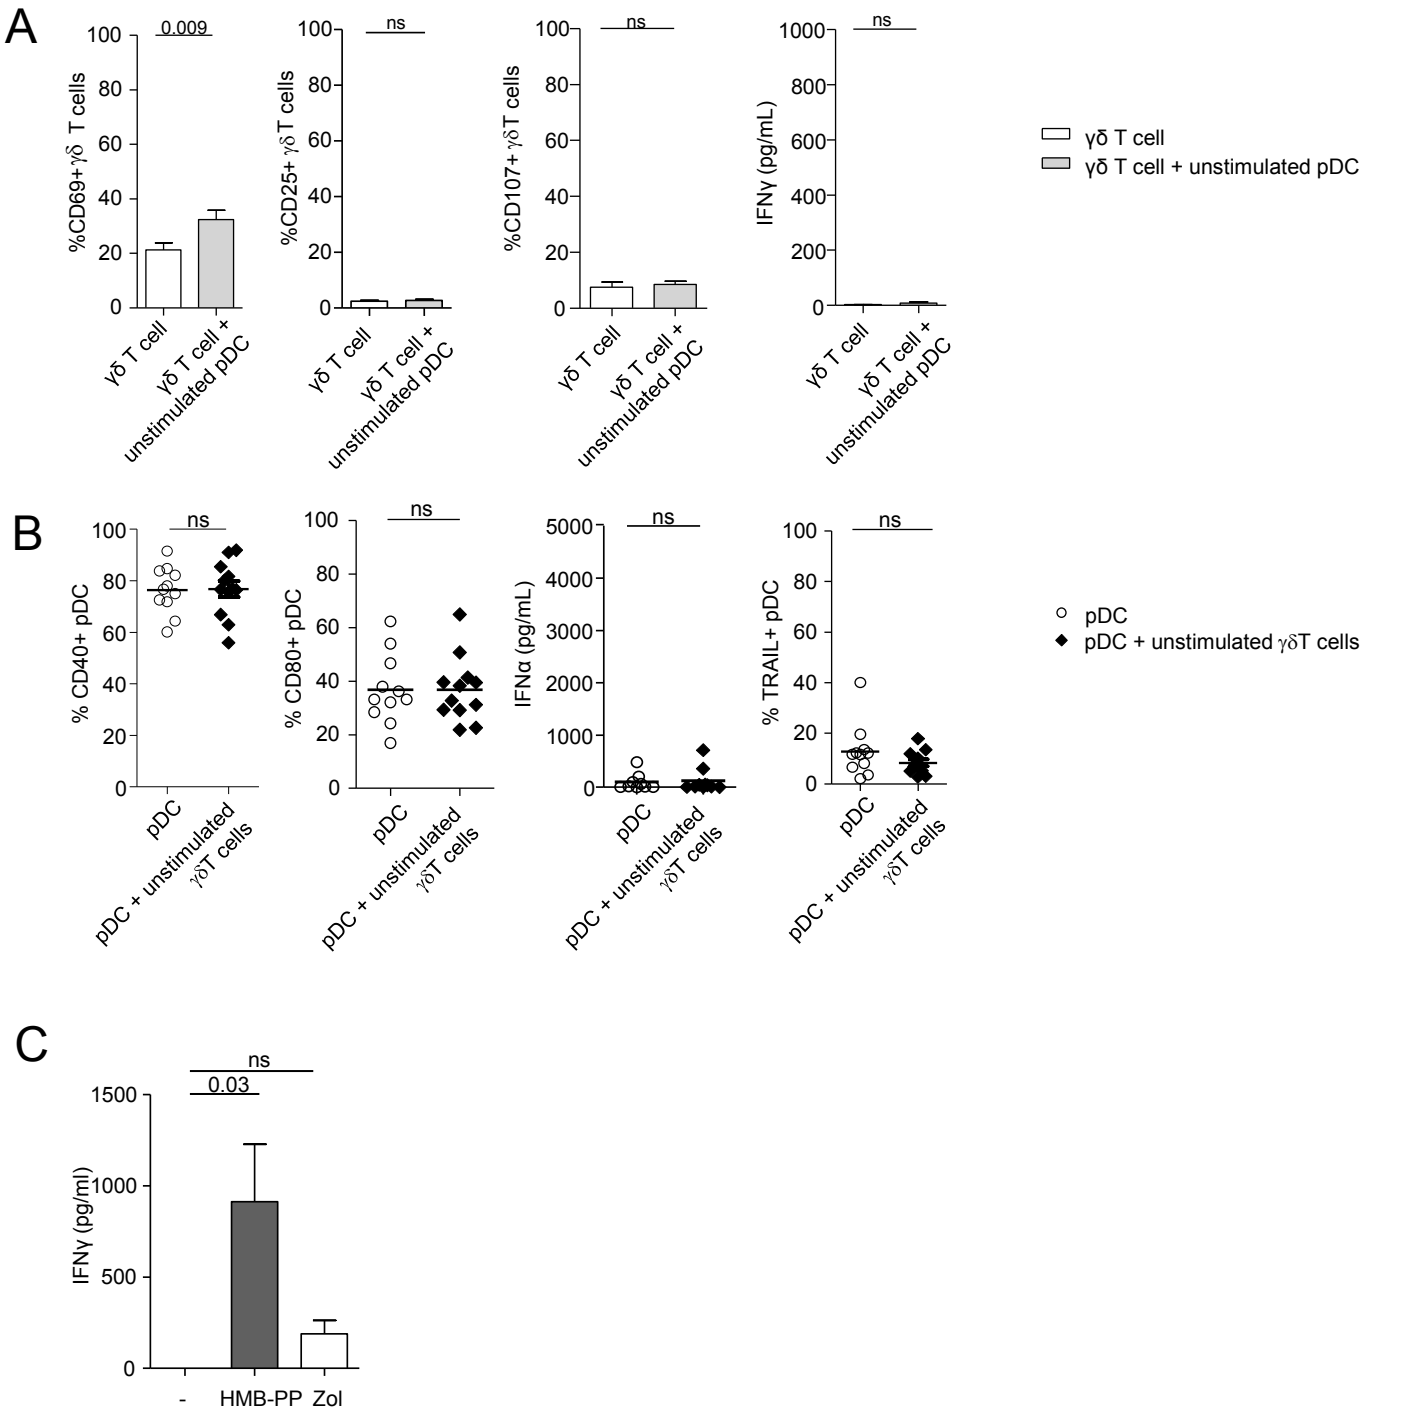

# Supplementary Figure 6

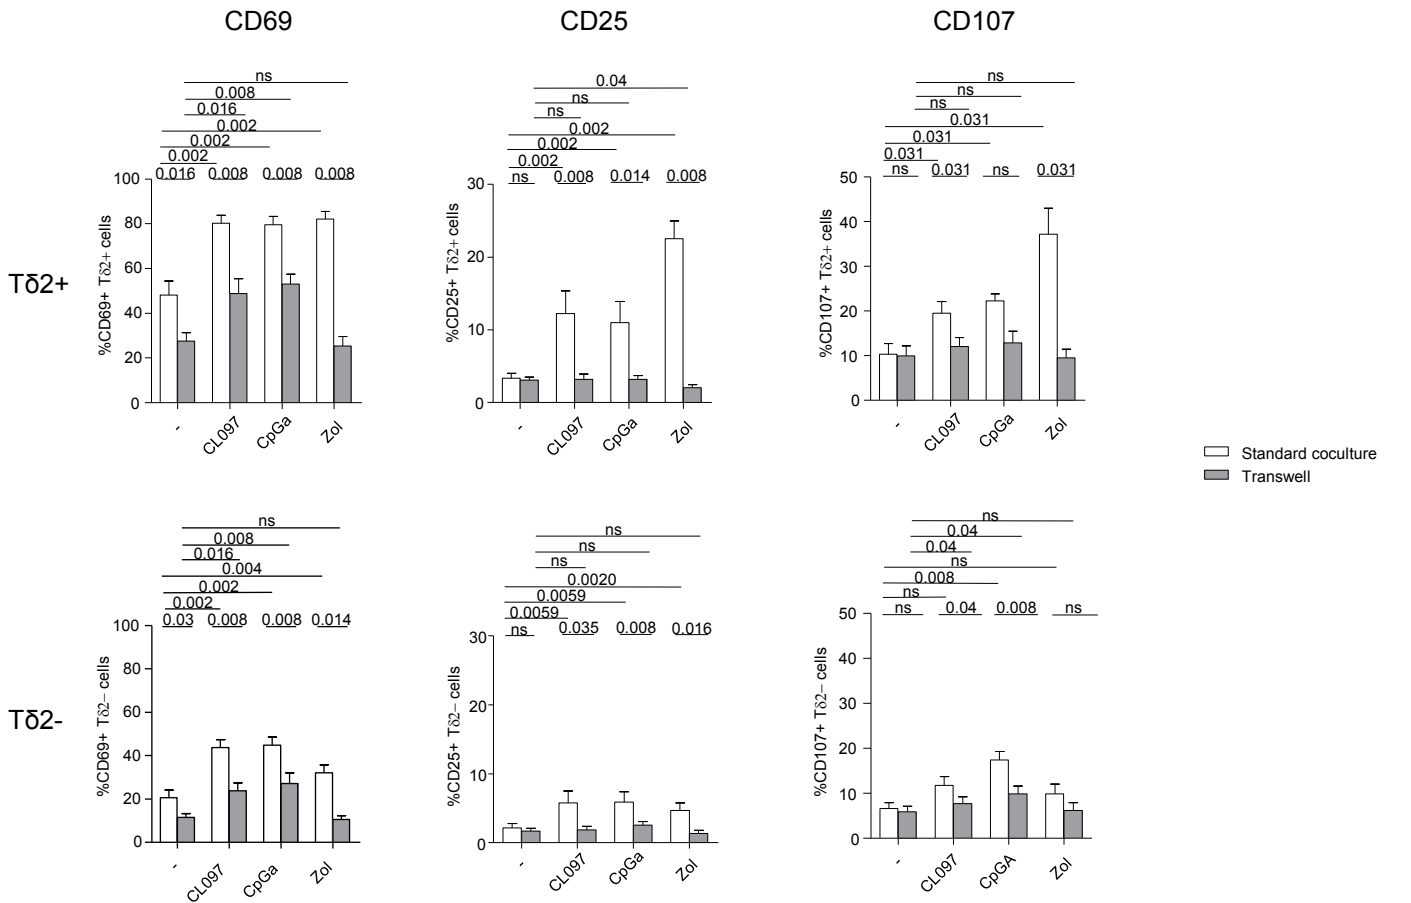

# Supplementary Figure 7

A

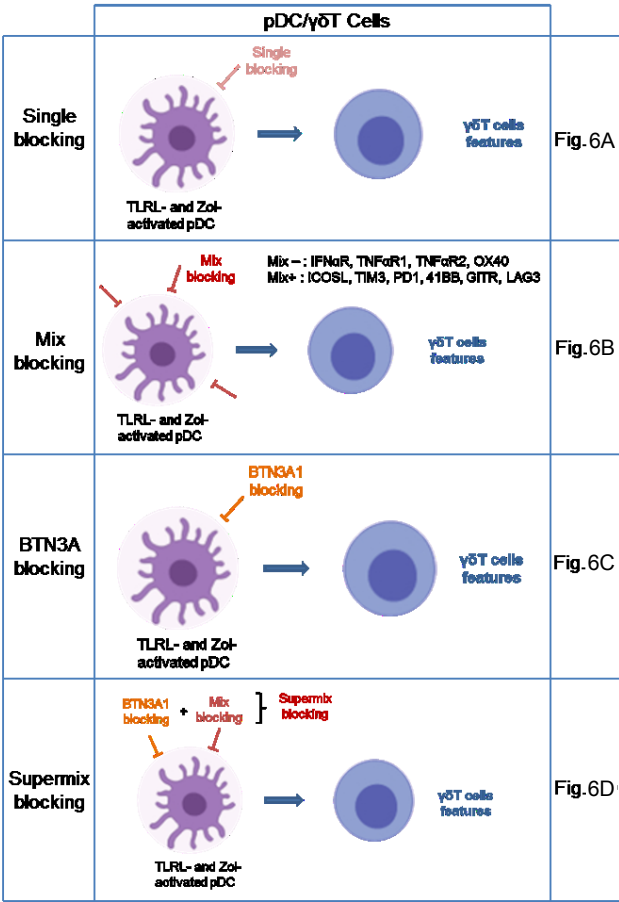

B

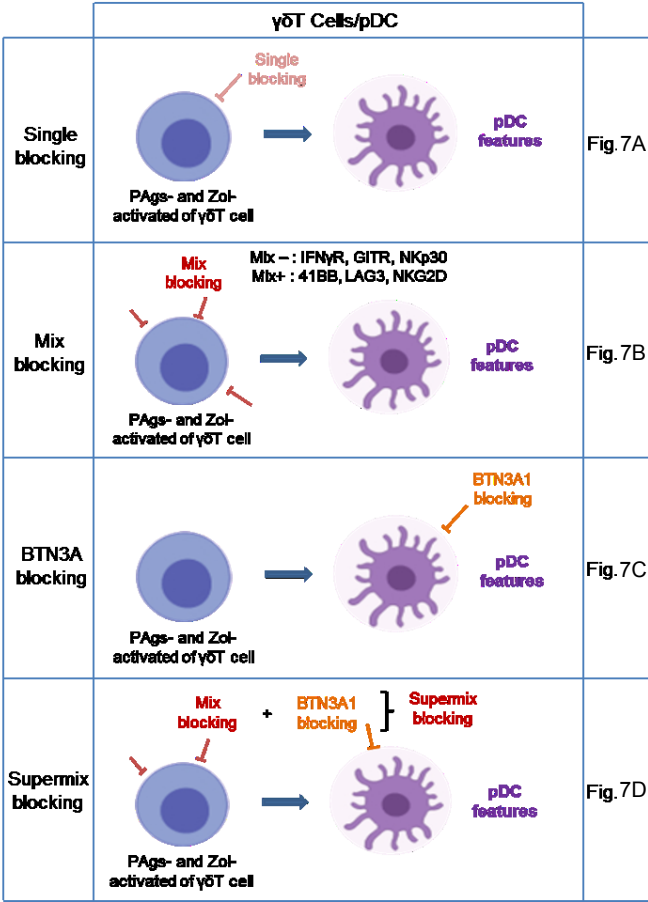

# Supplementary Figure 8

A

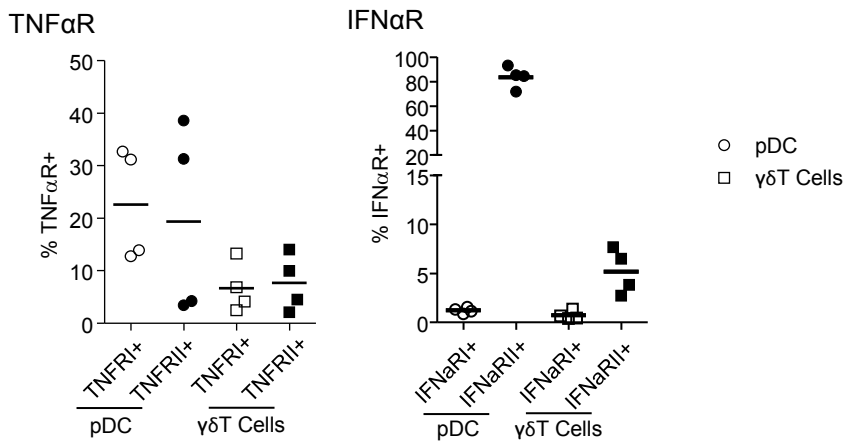

B

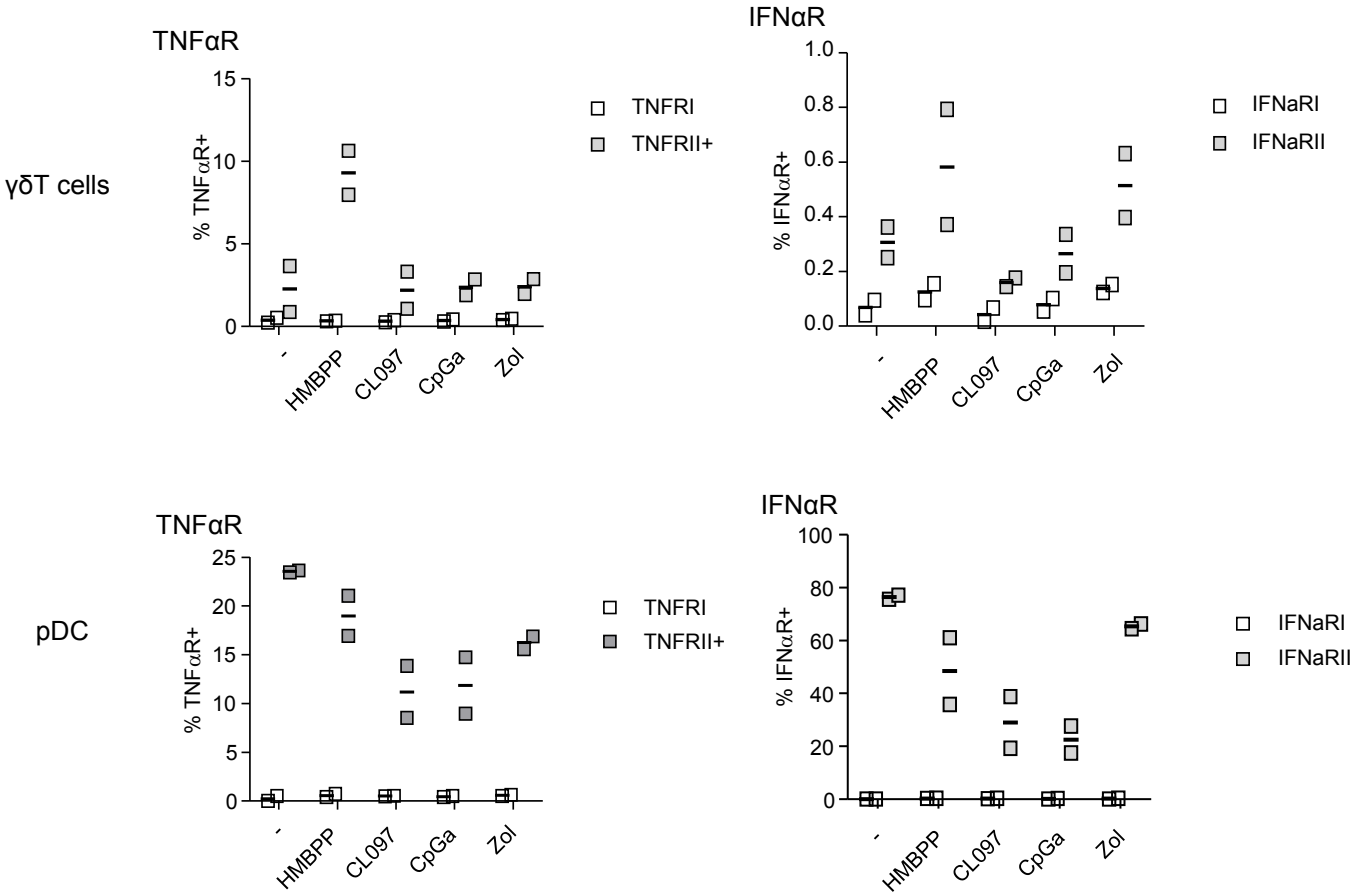

# Supplementary Figure 9

A

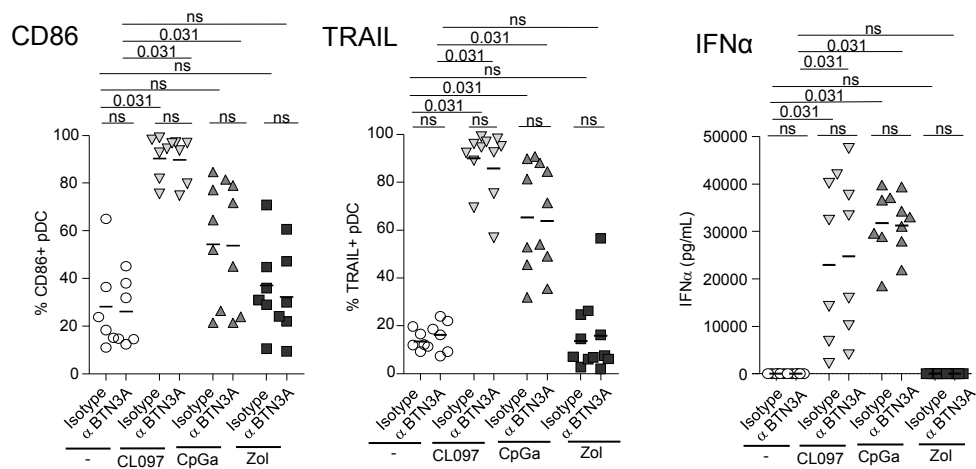

B

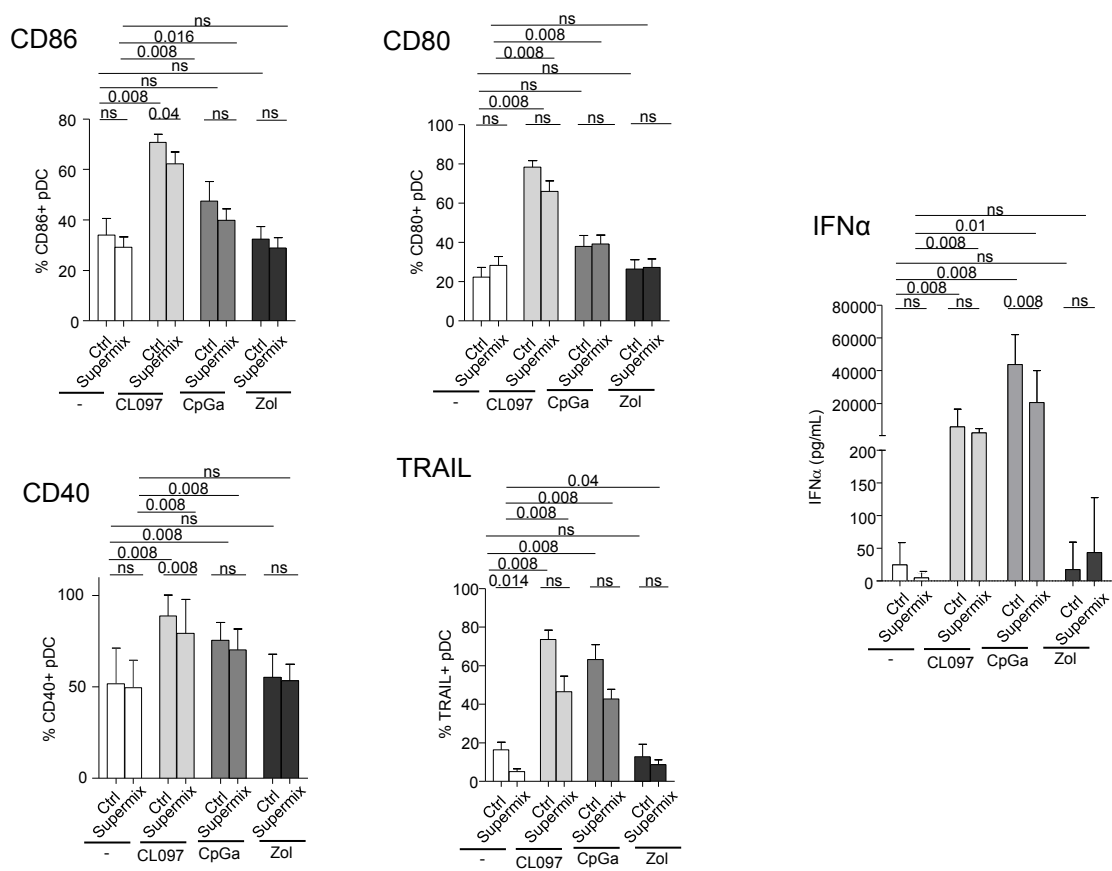

# Supplementary Figure 10

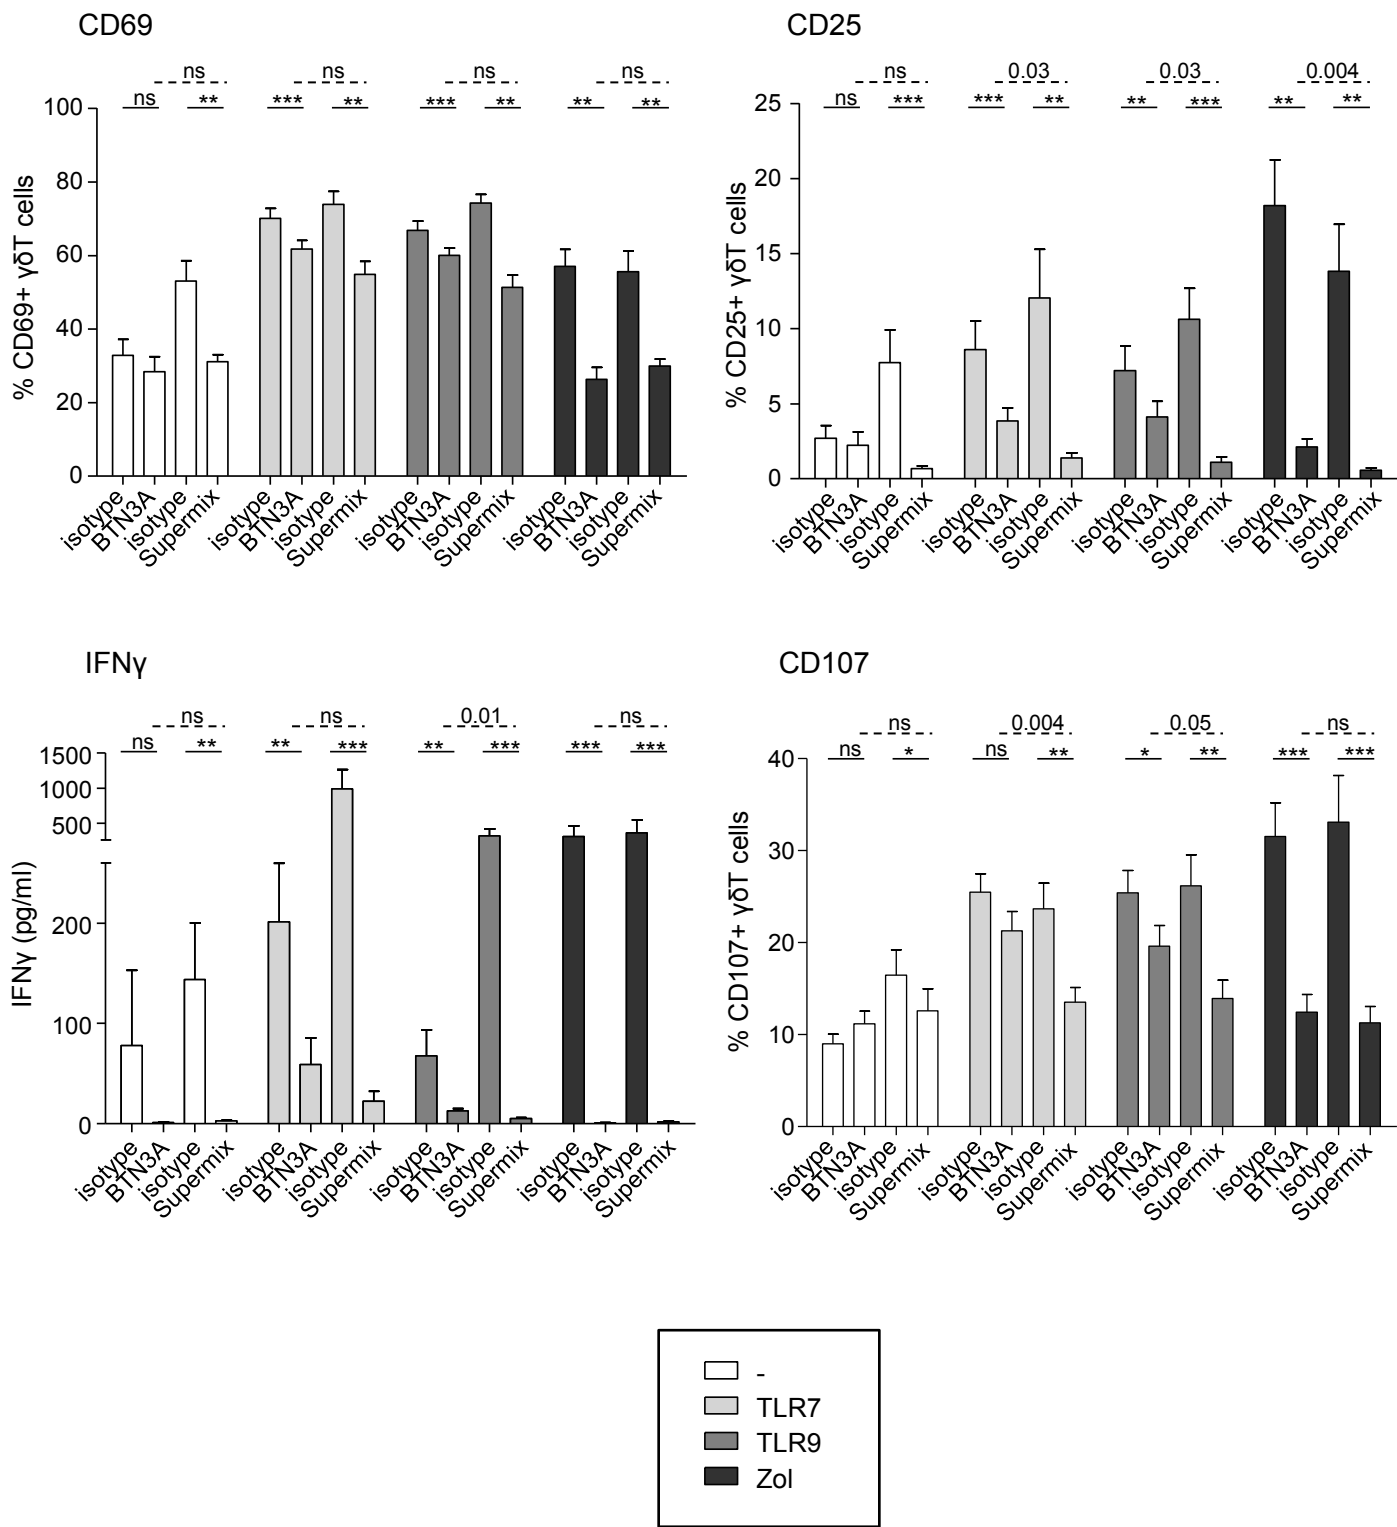

# Supplementary Figure 11

A

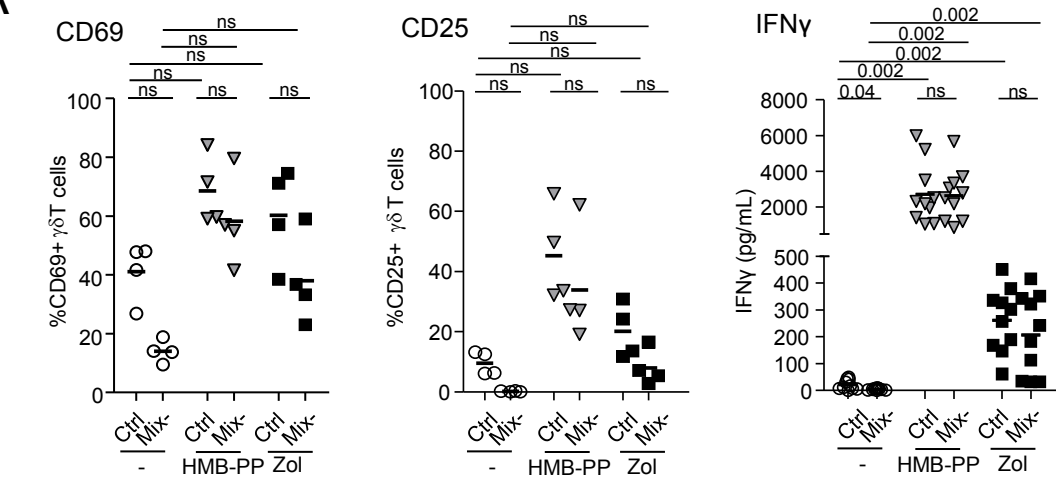

B

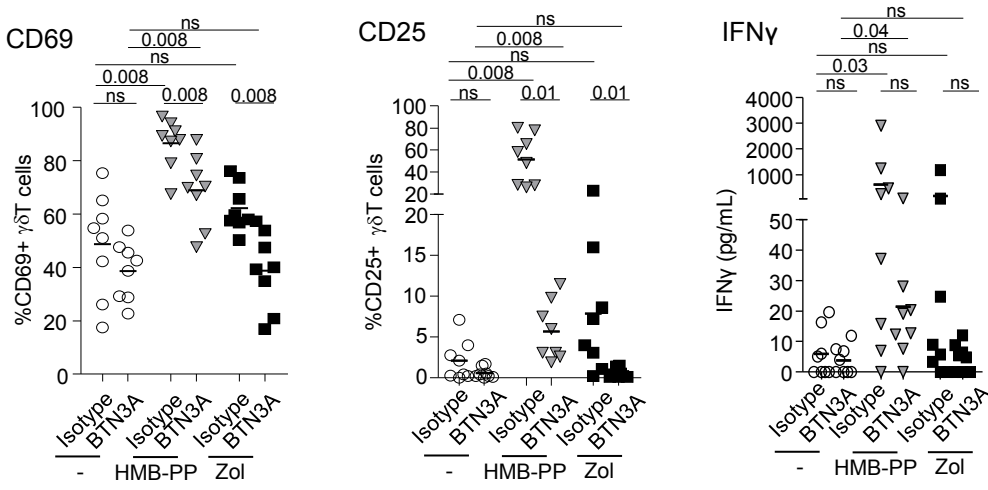



# Supplementary Figure 12

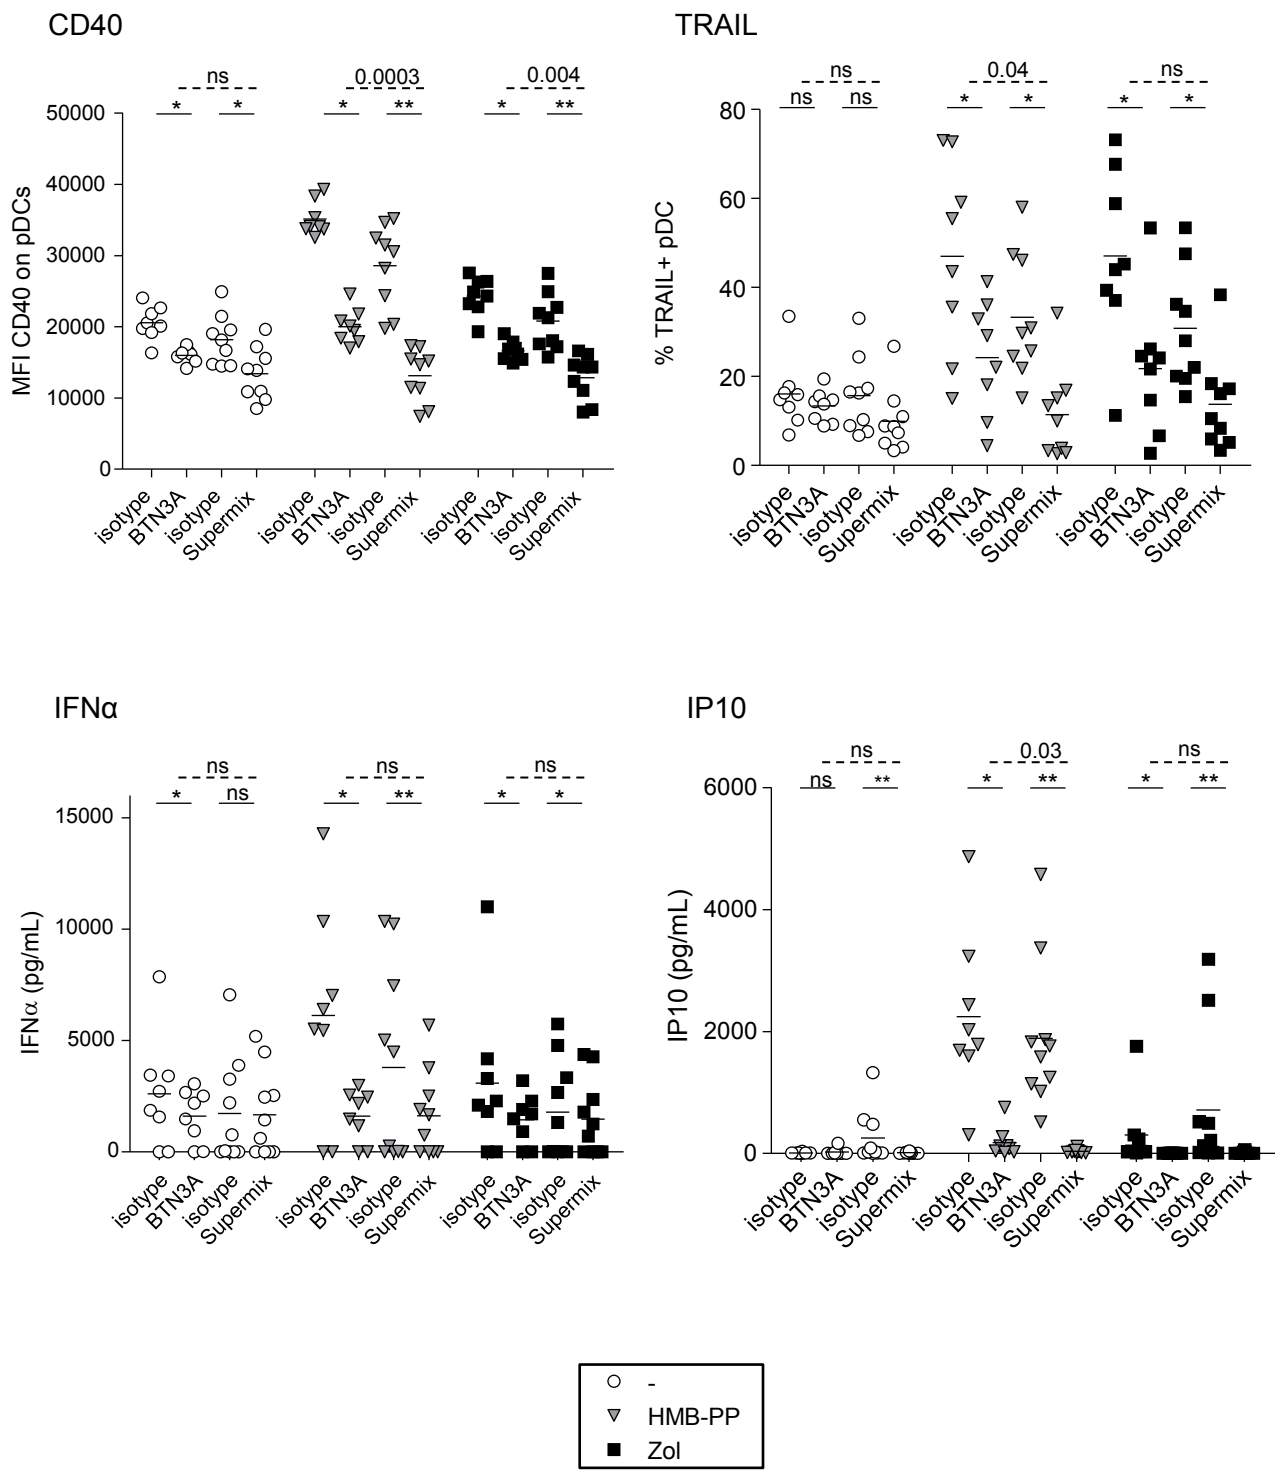

Supplement: Supplementary file [file 22538363]
